# Supplementary material
Source: publisher figshare collection journal article supplement (https://tandf.figshare.com/ndownloader/files/22927259)

**Sup. Figure 1.** (A) Summary and statistical analysis of experiments in Figure 5E with human normal ovary (n=7) and ovarian tumor tissues (n=9). Scale bar, 25  $\mu$ m (magnification,  $\times 40$ )

**Sup. Figure 2.** Protein stability experiment between RDM1 and P53 in SKOV3 *siRDM1*/siN cells with Cycloheximide (CHX) treatment.

Sup. Figure 1 Summary and statistical analysis of experiments in IHC

A

| Protein level | Samples       | -         | +         | ++        | +++       | Total samples |
|---------------|---------------|-----------|-----------|-----------|-----------|---------------|
| RDM1          | Normal ovary  | 3 (42.8%) | 3 (42.8%) | 1 (14.3%) | 0 (00.0%) | 7             |
|               | Ovarian tumor | 0 (0.0%)  | 1 (11.1%) | 5 (55.6%) | 3 (33.3%) | 9             |
| P53           | Normal ovary  | 0 (00.0%) | 0 (00.0%) | 4 (57.1%) | 3 (42.8%) | 7             |
|               | Ovarian tumor | 1 (11.1%) | 2 (22.2%) | 2 (22.2%) | 4 (66.7%) | 9             |
| RAD51         | Normal ovary  | 2 (28.6%) | 3 (42.8%) | 1 (14.3%) | 1 (14.3%) | 7             |
|               | Ovarian tumor | 1 (11.1%) | 1 (11.1%) | 4 (66.7%) | 3 (33.3%) | 9             |
| RAD52         | Normal ovary  | 3 (42.8%) | 3 (42.8%) | 1 (14.3%) | 0 (00.0%) | 7             |
|               | Ovarian tumor | 0 (00.0%) | 2 (22.2%) | 4 (66.7%) | 3 (33.3%) | 9             |

## Sup. Figure 2

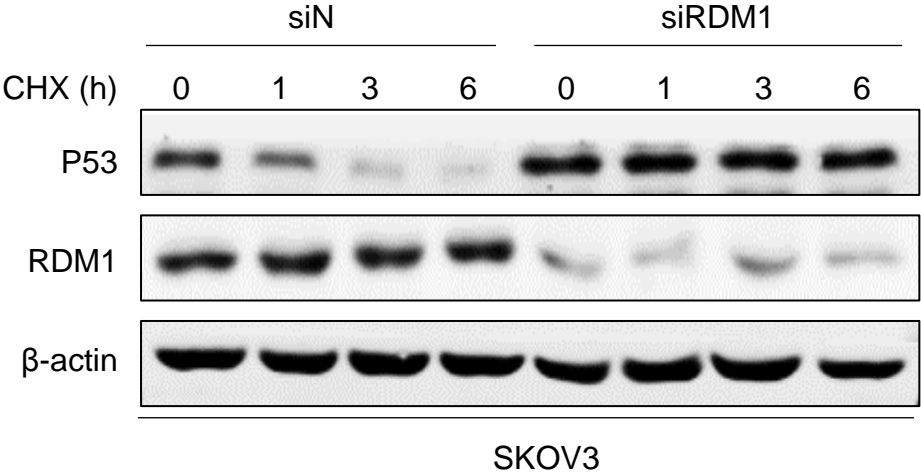

Supplement: Supplementary file 1 [file 22927259]
